# Supplementary material for: Toxins and Secretion Systems of Photorhabdus luminescens
Source: Toxins (Basel). 2010 Jun 1;2(6):1250–64. doi: 10.3390/toxins2061250 (PMC3153242; doi:10.3390/toxins2061250)
Supplement: Supplementary File 1: — PDF-Document (PDF, 197 KB) [file toxins-02-01250-s001.pdf]

## SUPPLEMENTARY MATERIAL

### Materials and methods

**Bioinformatics analysis.** For this project, protein sequences of known components of protein secretion systems were retrieved from the NCBI (National Center for Biotechnology Information) database ([www.ncbi.nlm.nih.gov](http://www.ncbi.nlm.nih.gov)) and they were used as queries in BLAST search ([www.ncbi.nlm.nih.gov/blast](http://www.ncbi.nlm.nih.gov/blast)) against the *P. luminescens*, subspecies *laumondii* TT01 (reference number NC 005126).

The retrieved sequences used include the type I secretion components of *Escherichia coli* (Hly), *Erwinia chrysanthemi* (Prt), *Bordetella pertussis* (Cya), *Serratia marcescens* (Lip), the type II secretion components of *Vibrio cholerae* (Eps), *Escherichia coli* (Gsp), *Aeromonas hydrophila* (Exe), *Erwinia chrysanthemi* (Out), *Pseudomonas aeruginosa* (Xcp), *Xanthomonas campestris* (Xps), *Klebsiella oxytoca* (Pul) and *Yersinia enterocolitica* (Yts1), the type III secretion components of *Yersinia pestis* (Ysc) and *Salmonella enterica* (Ssa), the type III flagellar system of *Escherichia coli* (Fli), the type IV secretion components of *Agrobacterium tumefaciens* (Vir), *Bordetella pertussis* (Ptl) and *Legionella pneumophila* (Dot/Icm), the type VI secretion components of *Vibrio cholerae* (VAS) and *Edwardsiella tarda* (Evp), Sec, twin-arginine translocation (Tat), signal recognition peptide (SRP) and signal peptidases (SPases) components of *Escherichia coli*, the chaperone/usher of *Escherichia coli* (Pap) TpsA and TpsB of *Serratia marcescens* (Sh1), *Haemophilus influenzae* (HMW1), *Bordetella pertussis* (Fha), *Erwinia chrysanthemi* (Hec), *Proteus mirabilis* (Hpm), *Edwardsiella tarda* (Eth), *Haemophilus ducreyi* (Hhd and Lps1), *Yersinia pestis* (Ytps1) and the autotransporter proteins from *Haemophilus influenzae* (Hia and Hap), *Yersinia enterocolitica* (YadA), *Helicobacter pylori* (VacA), avian pathogenic *Escherichia coli* (Tsh), *Shigella flexneri* (IcsA), *Bordetella pertussis* (BrkA) and *Pseudomonas aeruginosa* (EstA).

The hits from the BLAST search were screened based on the following criteria: a) there was a significantly important sequence identity ( $\geq 20\%$ ), b) the hits were part of the same gene cluster or operon and c) conserved residues and/or motifs specific to the components were identified. Pairwise sequence alignments for the assessment of the identity percentage between the query and the subject sequences was performed using Needleman-Wunch global alignment algorithm (<http://www.ebi.ac.uk/Tools/emboss/align/index.html>), while the signal peptides were predicted using SignalP (<http://www.cbs.dtu.dk/services/SignalP/>), screening only for Gram negative bacteria and up to 50 amino acids long. Motifs were searched manually.

**Supplementary Table 1.** One step secretion systems in *P. luminescens*

| System   | Components | NCBI Accession Number | Number of amino acids | Gene locus on <i>P. luminescens</i> chromosome | % Identity                     | Function/Structure                        |
|----------|------------|-----------------------|-----------------------|------------------------------------------------|--------------------------------|-------------------------------------------|
| Type III | YscV       | NP_930967             | 705 aa                | 4,429,651-4,431,768                            | 82.3% ( <i>Y. pestis</i> YscV) | SctV (Inner membrane needle base protein) |
|          | YscN       | NP_930973             | 440 aa                | 4,434,397-4,435,719                            | 85% ( <i>Y. pestis</i> YscN)   | ATPase                                    |
|          | YscP       | NP_930975             | 376 aa                | 4,436,192-4,437,322                            | 23.6% ( <i>Y. pestis</i> YscP) | SctP (Needle length regulator)            |
|          | YscQ       | NP_930976             | 310 aa                | 4,437,319-4,438,251                            | 47.3% ( <i>Y. pestis</i> YscQ) | ATPase associated protein                 |
|          | YscR       | NP_930977             | 217 aa                | 4,438,248-4,438,901                            | 82.5% ( <i>Y. pestis</i> YscR) | Inner membrane needle base protein        |
|          | YscS       | NP_930978             | 88 aa                 | 4,438,904-                                     | 77.3% ( <i>Y.</i>              | Inner membrane                            |

|                           |        |           |         |                     |                                  |                                                                                         |
|---------------------------|--------|-----------|---------|---------------------|----------------------------------|-----------------------------------------------------------------------------------------|
|                           |        |           |         | 4,439,170           | <i>pestis</i> YscS)              | needle base protein                                                                     |
|                           | YscT   | NP_930979 | 262 aa  | 4,439,167-4,439,955 | 67.2% ( <i>Y. pestis</i> YscT)   | SctT (Inner membrane needle base protein)                                               |
|                           | YscU   | NP_930980 | 351 aa  | 4,439,952-4,441,007 | 68.4% ( <i>Y. pestis</i> YscU)   | SctU (Inner membrane needle base protein)                                               |
|                           | YscC   | NP_930984 | 614 aa  | 4,444,107-4,445,951 | 64.6% ( <i>Y. pestis</i> YscC)   | SctC (Outer membrane secretin)                                                          |
|                           | YscD   | NP_930985 | 422 aa  | 4,445,948-4,447,216 | 26% ( <i>S. enterica</i> SsaD)   | SctD (Needle component)                                                                 |
|                           | YscF   | NP_930987 | 84 aa   | 4,447,418-4,447,672 | 63.2% ( <i>Y. pestis</i> YscF)   | SctF (Needle)                                                                           |
|                           | YscJ   | NP_930991 | 245 aa  | 4,449,008-4,449,745 | 71.5% ( <i>Y. pestis</i> YscJ)   | SctJ (MS ring protein)                                                                  |
|                           | YscK   | NP_930992 | 208 aa  | 4,449,745-4,450,371 | 47.4% ( <i>Y. pestis</i> YscK)   | SctK (ATPase associated protein)                                                        |
| Type III flagellar system | YscU   | NP_929162 | 383 aa  | 2,256,412-2,257,563 | 60.7% ( <i>E. coli</i> FhlB)     | Membrane component                                                                      |
|                           | YscV   | NP_929163 | 693 aa  | 2,257,556-2,259,637 | 80.4% ( <i>E. coli</i> FhlA)     | Membrane component                                                                      |
|                           | YscS   | NP_929204 | 89 aa   | 2,304,907-2,305,176 | 76.4% ( <i>E. coli</i> FliQ)     | Membrane component                                                                      |
|                           | YscR   | NP_929205 | 244 aa  | 2,305,197-2,305,931 | 77.8% ( <i>E. coli</i> FliP)     | Membrane component                                                                      |
|                           | YscQ   | NP_929207 | 139 aa  | 2,306,417-2,306,836 | 69.5% ( <i>E. coli</i> FliN)     | Flagellar motor switch protein                                                          |
|                           | YscN   | NP_929212 | 454 aa  | 2,310,303-2,311,667 | 79.2% ( <i>E. coli</i> FliI)     | ATPase                                                                                  |
|                           | YscL   | NP_929213 | 243 aa  | 2,311,667-2,312,371 | 53.3% ( <i>E. coli</i> FliH)     | Flagellar assembly protein                                                              |
|                           | YscJ   | NP_929215 | 567 aa  | 2,313,353-2,315,056 | 60.6% ( <i>E. coli</i> FliF)     | MS ring protein                                                                         |
|                           | EvpH-1 | NP_929544 | 860 aa  | 2,684,731-2,687,313 | 49.9% ( <i>E. tarda</i> EvpH)    | Hypothetical protein similar to ClpA-B type chaperone (ATPase)                          |
|                           | EvpO-1 | NP_929545 | 1169 aa | 2,687,306-2,690,815 | 23.7% ( <i>E. tarda</i> EvpO)    | Some similarities with unknown protein and putative macrophage toxin, IcmF-like protein |
|                           | EvpN-1 | NP_929546 | 206 aa  | 2,690,831-2,691,451 | 26.2% ( <i>E. tarda</i> EvpN)    | Hypothetical protein similar to unknown protein                                         |
|                           | VasE-1 | NP_929547 | 465 aa  | 2,691,451-2,692,848 | 24.3% ( <i>V. cholerae</i> VasE) | Hypothetical protein highly similar to unknown protein                                  |
|                           | EvpL-1 | NP_929548 | 225 aa  | 2,692,852-2,693,529 | 19.3% ( <i>E. tarda</i> EvpL)    | Predicted component of the type VI protein secretion system                             |
|                           | EvpK-1 | NP_929549 | 367 aa  | 2,693,522-2,694,625 | 31% ( <i>E. tarda</i> EvpK)      | Predicted component of the type VI protein                                              |

|         |        |           |         |                     |                                  |                                                                                             |
|---------|--------|-----------|---------|---------------------|----------------------------------|---------------------------------------------------------------------------------------------|
| Type VI |        |           |         |                     |                                  | secretion system                                                                            |
|         | EvpJ-1 | NP_929550 | 100 aa  | 2,694,639-2,694,941 | 70.3% ( <i>E. tarda</i> EvpJ)    | Uncharacterized conserved protein similar to unknown protein                                |
|         | EvpI-1 | NP_929552 | 668 aa  | 2,695,569-2,697,575 | 34% ( <i>E. tarda</i> EvpI)      | Uncharacterized conserved protein similar to VgrG protein                                   |
|         | EvpG-1 | NP_929553 | 336 aa  | 2,697,600-2,698,610 | 30.9% ( <i>E. tarda</i> EvpG)    | Hypothetical protein similar to unknown protein                                             |
|         | EvpF-1 | NP_929554 | 603 aa  | 2,698,601-2,700,412 | 35.2% ( <i>E. tarda</i> EvpF)    | Hypothetical protein similar to unknown protein                                             |
|         | EvpE-1 | NP_929555 | 147 aa  | 2,700,912-2,700,860 | 28.1% ( <i>E. tarda</i> EvpE)    | Hypothetical protein similar to unknown protein                                             |
|         | EvpC-1 | NP_929556 | 164 aa  | 2,700,912-2,701,406 | 34.9% ( <i>E. tarda</i> EvpC)    | Hypothetical protein similar to unknown protein                                             |
|         | EvpB-1 | NP_929557 | 493 aa  | 2,701,463-2,702,944 | 60.6% ( <i>E. tarda</i> EvpB)    | Hypothetical protein similar to unknown protein                                             |
|         | EvpA-1 | NP_929558 | 183 aa  | 2,702,952-2,703,503 | 42.1% ( <i>E. tarda</i> EvpA)    | Hypothetical protein similar to unknown protein                                             |
|         | EvpI-2 | NP_927712 | 631 aa  | 377,581-379,476     | 28.7% ( <i>E. tarda</i> EvpI)    | Similar to VrgG protein                                                                     |
|         | VasK-1 | NP_927714 | 1181 aa | 382,431-385,976     | 37.9% ( <i>V. cholerae</i> VasK) | Similar to putative macrophage toxin, IcmF-related protein, putative transmembrane protein. |
|         | VasJ-1 | NP_927715 | 477 aa  | 385,973-387,406     | 30.5% ( <i>V. cholerae</i> VasJ) | Similar to unknown protein                                                                  |
|         | VasI   | NP_927716 | 215 aa  | 387,412-388,059     | 26.7% ( <i>V. cholerae</i> VasI) | Similar to unknown protein                                                                  |
|         | EvpH-2 | NP_927718 | 881 aa  | 388,853-391,498     | 44.5% ( <i>E. tarda</i> EvpH)    | Similar to ClpA-B type chaperone (ATPase)                                                   |
|         | VasF-1 | NP_927719 | 256 aa  | 391,509-392,279     | 37.4% ( <i>V. cholerae</i> VasF) | Highly similar to Unknown protein                                                           |
|         | VasE-2 | NP_927720 | 450 aa  | 399,279-393,631     | 43.6% ( <i>V. cholerae</i> VasE) | Highly similar to unknown protein                                                           |
|         | VasD   | NP_927721 | 188 aa  | 393,634-394,200     | 30.9% ( <i>V. cholerae</i> VasD) | Similar to unknown protein, predicted component of type VI secretion system                 |
|         | VasC   | NP_927722 | 428 aa  | 394,200-395,486     | 30.4% ( <i>V. cholerae</i> VasC) | Similar to unknown protein, predicted component of type VI secretion system                 |
|         | VasB-1 | NP_927723 | 326 aa  | 395,492-396,472     | 37.4% ( <i>V. cholerae</i> VasB) | Similar to unknown protein                                                                  |
|         | VasA-1 | NP_927724 | 615 aa  | 396,508-            | 46.4% ( <i>V.</i>                | Highly similar to                                                                           |

|  |        |           |         |                     |                                   |                                                                  |
|--|--------|-----------|---------|---------------------|-----------------------------------|------------------------------------------------------------------|
|  |        |           |         | 398,355             | <i>cholerae</i> VasA)             | unknown protein                                                  |
|  | EvpB-2 | NP_927726 | 492 aa  | 398,804-400,282     | 40.6% ( <i>E. tarda</i> EvpB)     | Highly similar to unknown protein                                |
|  | EvpA-2 | NP_927727 | 165 aa  | 400,306-406,803     | 30.3% ( <i>E. tarda</i> EvpA)     | Highly similar to unknown protein                                |
|  | Hcp1-1 | NP_927728 | 172 aa  | 401,704-402,222     | 77.3% ( <i>V. cholerae</i> Hcp1)  | Highly similar to Hcp protein                                    |
|  | VasB-2 | NP_930451 | 362 aa  | 3,811,002-3,812,090 | 23.1% ( <i>V. cholerae</i> VasB)  | Similar to unknown protein                                       |
|  | VasA-2 | NP_930452 | 586 aa  | 3,812,054-3,813,814 | 30.6% ( <i>V. cholerae</i> VasA)  | Similar to unknown protein                                       |
|  | VasK-2 | NP_930458 | 1123 aa | 3,819,697-3,823,068 | 17.8% ( <i>V. cholerae</i> VasK)  | Similar to putative protein of <i>Y. pestis</i> , IcmF homologue |
|  | EvpI-3 | NP_930464 | 841 aa  | 3,827,457-3,829,982 | 20% ( <i>E. tarda</i> EvpI)       | Similar to vgrG related protein                                  |
|  | EvpI-4 | NP_930473 | 799 aa  | 3,840,506-3,842,905 | 21.8% ( <i>E. tarda</i> EvpI)     | Similar to vgrG related protein                                  |
|  | VasK-3 | NP_930474 | 1123 aa | 3,843,641-3,847,012 | 17.3% ( <i>V. cholerae</i> VasK)  | Similar to putative protein of <i>Y. pestis</i> , IcmF homologue |
|  | VgrG2  | NP_930480 | 842 aa  | 3,852,594-3,855,122 | 21.5% ( <i>V. cholerae</i> VgrG2) | Similar to VrgG protein                                          |
|  | Hcp1-2 | NP_930481 | 163 aa  | 3,855,299-3,855,770 | 30.8% ( <i>V. cholerae</i> Hcp1)  | Highly similar to Hcp protein                                    |
|  | VasE-3 | NP_930486 | 449 aa  | 3,860,551-3,861,900 | 27% ( <i>V. cholerae</i> VasE)    | Highly similar to unknown protein                                |
|  | EvpB-3 | NP_930487 | 508 aa  | 3,861,916-3,863,442 | 41% ( <i>E. tarda</i> EvpB)       | Highly similar to unknown protein                                |
|  | EvpA-3 | NP_930488 | 165 aa  | 3,863,474-3,863,971 | 31.1% ( <i>E. tarda</i> EvpA)     | Highly similar to unknown protein                                |
|  | VasL   | NP_931381 | 459 aa  | 4,911,700-4,913,079 | 20.4% ( <i>V. cholerae</i> VasL)  | Similar to unknown protein                                       |
|  | VasB-3 | NP_931384 | 346 aa  | 4,914,086-4,915,126 | 23% ( <i>V. cholerae</i> VasB)    | Similar to unknown protein                                       |
|  | VasA-3 | NP_931385 | 588 aa  | 4,915,126-4,916,892 | 30.1% ( <i>V. cholerae</i> VasA)  | Similar to unknown protein                                       |
|  | VasJ-2 | NP_931386 | 532 aa  | 4,916,971-4,918,569 | 20.8% ( <i>V. cholerae</i> VasJ)  | Similar to unknown protein                                       |
|  | Hcp1-3 | NP_931392 | 163 aa  | 4,925,955-4,926,446 | 32% ( <i>V. cholerae</i> Hcp1)    | Highly similar to Hcp protein                                    |
|  | VasK-4 | NP_931395 | 1116 aa | 4,927,191-4,930,550 | 18% ( <i>V. cholerae</i> VasK)    | Similar to putative protein of <i>Y. pestis</i> , IcmF homologue |
|  | EvpI-5 | NP_931403 | 792 aa  | 4,938,603-          | 21.6% ( <i>E.</i>                 | Similar to VgrG                                                  |

|  |        |           |        |                     |                                  |                                           |
|--|--------|-----------|--------|---------------------|----------------------------------|-------------------------------------------|
|  |        |           |        | 4,940,981           | <i>tarda</i> EvpI)               | related protein                           |
|  | EvpH-3 | NP_931404 | 893 aa | 4,940,978-4,943,659 | 45.8% ( <i>E. tarda</i> EvpH)    | Similar to ClpA-B type chaperone (ATPase) |
|  | VasF-2 | NP_931406 | 214 aa | 4,945,601-4,946,245 | 20% ( <i>V. cholerae</i> VasF)   | Highly similar to unknown protein         |
|  | VasE-4 | NP_931407 | 453 aa | 4,946,288-4,947,649 | 28.6% ( <i>V. cholerae</i> VasE) | Highly similar to unknown protein         |
|  | EvpB-4 | NP_931408 | 510 aa | 4,947,666-4,949,198 | 39.5% ( <i>E. tarda</i> EvpB)    | Similar to unknown protein                |

**Supplementary table 2.** Two step secretion systems in *P. luminescens*

| System  | Components | NCBI Accession Number | Number of amino acids | Gene locus on <i>P. luminescens</i> chromosome | % Identity                                            | Function/Structure                                                                            |
|---------|------------|-----------------------|-----------------------|------------------------------------------------|-------------------------------------------------------|-----------------------------------------------------------------------------------------------|
| Type II | GspG       | NP_929013             | 190 aa                | 2,068,346-2,068,918                            | 20% ( <i>V. cholerae</i> EpsG)                        | Hypothetical protein similar to type IV prepilin                                              |
|         | GspJ       | NP_929013             | 190 aa                | 2,068,346-2,068,918                            | 17.9% ( <i>V. cholerae</i> EpsJ)                      | Hypothetical protein similar to type IV prepilin                                              |
|         | GspO       | NP_929014             | 264 aa                | 2,069,076-2,069,870                            | 44% ( <i>Y. enterocolitica</i> Yts1O)                 | Type IV prepilin-like protein leader peptide processing enzyme                                |
|         | GspJ       | NP_929015             | 391 aa                | 2,069,910-2,071,085                            | 8.3% ( <i>E. coli</i> GspJ)                           | Hypothetical protein with some similarities to PilV                                           |
|         | GspH       | NP_929015             | 391 aa                | 2,069,910-2,071,085                            | 12.9% ( <i>Y. enterocolitica</i> Yts1H)               | Hypothetical protein with some similarities to PilV                                           |
|         | GspD       | NP_929019             | 534 aa                | 2,072,176-2,073,780                            | 18% ( <i>K. pneumoniae</i> PulD)                      | Hypothetical protein similar to PilN, BfpB                                                    |
|         | GspE       | NP_929022             | 520 aa                | 2,075,627-2,077,189                            | 28% ( <i>E. coli</i> GspE/ <i>A. hydrophila</i> ExeE) | Hypothetical protein similar to PilQ, BfpD                                                    |
|         | GspF       | NP_929023             | 365 aa                | 2,077,196-2,078,293                            | 19.1% ( <i>X. campestris</i> XpsF)                    | Hypothetical protein similar to BfpE, PilR and toxin coregulated pilus biosynthesis protein E |
|         | Gsp I      | NP_930846             | 140 aa                | 4,286,072-4,286,494                            | 14.8% ( <i>A. hydrophila</i> ExeI)                    | Putative major pilin subunit                                                                  |
|         | GspJ       | NP_930846             | 140 aa                | 4,286,072-4,286,494                            | 19.7% ( <i>Y. enterocolitica</i> Yts1J)               | Putative major pilin subunit                                                                  |
|         | GspH       | NP_930846             | 140 aa                | 4,286,072-4,286,494                            | 10% ( <i>V. cholerae</i> EpsH)                        | Putative major pilin subunit                                                                  |
|         | GspG       | NP_930846             | 140 aa                | 4,286,072-4,286,494                            | 22.6% ( <i>E. coli</i> GspG)                          | Putative major pilin subunit                                                                  |
|         | GspE       | NP_930847             | 480 aa                | 4,286,662-                                     | 38.2% ( <i>E.</i>                                     | Hypothetical                                                                                  |

|     |      |           |        |                     |                                         |                                                                                             |
|-----|------|-----------|--------|---------------------|-----------------------------------------|---------------------------------------------------------------------------------------------|
|     |      |           |        | 4,288,104           | <i>coli</i> GspE)                       | protein                                                                                     |
|     | GspF | NP_930848 | 399 aa | 4,288,107-4,289,306 | 26.3% ( <i>E. chrysanthemi</i> OutF)    | Type IV pilin biogenesis protein                                                            |
|     | GspE | NP_928383 | 517 aa | 1,232,966-1,234,519 | 28.1% ( <i>Y. enterocolitica</i> Yts1E) | Probable nucleotide binding protein similar to PilQ                                         |
|     | GspF | NP_928384 | 361 aa | 1,234,512-1,235,597 | 19.5% ( <i>E. coli</i> GspF)            | Hypothetical protein highly similar to PilR protein                                         |
|     | GspO | NP_928386 | 221 aa | 1,236,269-1,236,934 | 14.9% ( <i>X. campestris</i> XpsO)      | Hypothetical protein probable prepilin peptidase similar to prepilin peptidase PilU protein |
| Tat | TatA | NP_931583 | 86 aa  | 5,158,550-5,158,810 | 64.8% (TatA <i>Escherichia coli</i> )   | Sec-independent protein translocase protein                                                 |
|     | TatB | NP_931582 | 147 aa | 5,158,103-5,158,546 | 57.6% (TatB <i>Escherichia coli</i> )   | Sec-independent protein translocase protein                                                 |
|     | TatC | NP_931581 | 260 aa | 5,157,299-5,158,081 | 75.8% (TatC <i>Escherichia coli</i> )   | Sec-independent protein translocase protein, TatABCE protein translocation system subunit   |
|     | TatD | NP_930060 | 261 aa | 3,356,852-3,357,637 | 29.4% (TatD <i>Escherichia coli</i> )   | Highly similar to putative deoxyribonuclease YcfH and to probable metal-dependent hydrolase |
|     |      | NP_927869 | 257 aa | 572,451-573,224     | 25.6% (TatD <i>Escherichia coli</i> )   | Tat-like protein, similar to unknown protein YjjV of <i>Escherichia coli</i>                |
|     | TatE | NP_931583 | 86 aa  | 5,158,550-5,158,810 | 64.8% (TatE <i>Escherichia coli</i> )   | Sec-independent protein translocase protein                                                 |
|     | SecA | NP_930853 | 903 aa | 4,291,546-4,291,257 | 89% ( <i>E. coli</i> SecA)              | Preprotein translocase subunit SecA, ATPase                                                 |
|     | SecB | NP_931393 | 158 aa | 5,612,392-5,612,868 | 85.6% ( <i>E. coli</i> SecB)            | Preprotein translocase subunit SecB, molecular chaperone                                    |
|     | SecE | NP_927786 | 127 aa | 460,617-461,000     | 76.4% ( <i>E. coli</i> SecE)            | Preprotein translocase subunit SecE, channel for translocation across IM                    |
|     | SecY | NP_931868 | 443 aa | 5,488,023-5,489,354 | 98% ( <i>E. coli</i> SecY)              | Preprotein translocase subunit SecY, channel pore formation with SecE and                   |

|                    |       |           |          |                     |                                    |                                                                                                                         |
|--------------------|-------|-----------|----------|---------------------|------------------------------------|-------------------------------------------------------------------------------------------------------------------------|
| Sec translocase    |       |           |          |                     |                                    | SecG                                                                                                                    |
|                    | SecD  | NP_931103 | 615 aa   | 4,573,541-4,575,388 | 82% ( <i>E. coli</i> SecD)         | Preprotein translocase subunit SecD, complex formation with SecF and YajC that stimulates the pmf protein translocation |
|                    | SecF  | NP_931102 | 322 aa   | 4,572,562-4,573,530 | 77.4% ( <i>E. coli</i> SecF)       | Preprotein translocase subunit SecF, complex formation with SecD and YajC that stimulates the pmf protein translocation |
|                    | SecG  | NP_931696 | 112 aa   | 5,294,034-5,294,372 | 76.8% ( <i>E. coli</i> SecG)       | Preprotein translocase subunit SecG                                                                                     |
|                    | YajC  | NP_931104 | 109 aa   | 4,575,416-4,575,745 | 83.6% ( <i>E. coli</i> YajC)       | Preprotein translocase subunit YajC, links the SecD/SecF/YajC/YidC complex with the SecY/SecE/SecG Complex              |
|                    | YidC  | NP_932057 | 546 aa   | 5,686,149-5,687,789 | 74.7% ( <i>E. coli</i> YidC)       | Putative IM protein translocase component YidC                                                                          |
| SPases             | LepB  | NP_930561 | 326 aa   | 3,968,282-3,969,262 | 58.7% ( <i>E. coli</i> LepB)       | Signal peptidase I, cleavage of the N-terminal signal peptide of the secreted protein                                   |
|                    | LspA  | NP_927940 | 167 aa   | 674,775-675,278     | 68.9% ( <i>E. coli</i> LspA)       | Lipoprotein signal peptidase                                                                                            |
|                    | BfpA  | NP_929014 | 264 aa   | 2,069,076-2,069,870 | 26.6% ( <i>E. coli</i> BfpA)       | Type IV prepilin-like proteins signal peptide processing enzyme                                                         |
| SRP                | Ffh   | NP_928567 | 453 aa   | 1,454,569-1,455,930 | 87.6% ( <i>E. coli</i> Ffh)        | Signal recognition particle protein                                                                                     |
|                    | FtsY  | NP_931296 | 424 aa   | 4,792,359-4,793,633 | 65% ( <i>E. coli</i> FtsY)         | Cell division protein, SRP GTPase                                                                                       |
| Type V (AT)        | EstA  | NP_930727 | 649 aa   | 4,101,200-4,103,149 | 23% ( <i>P. aeruginosa</i> EstA)   | Lipase 1 precursor (triacylglycerol lipase)                                                                             |
| Two-partner system |       |           |          |                     | 20% ( <i>S. marcescens</i> Sh1A)   | Some similarities with hemagglutinin/hemolysin-related protein. Putative transmembrane protein                          |
|                    | TpsA1 | NP_927589 | 1,719 aa | 230,329-235,488     |                                    |                                                                                                                         |
|                    |       |           |          | 235,518-237,197     | 27.8% ( <i>S. marcescens</i> Sh1B) | Similar to hemolysin activation/secretion protein                                                                       |
|                    | TpsB1 | NP_927590 | 559 aa   |                     |                                    |                                                                                                                         |
|                    | TpsA2 | NP_928461 | 2,937 aa | 1,327,789-          | 17.3% ( <i>S.</i>                  | Some similarities                                                                                                       |

|            |            |           |          |                     |                                    |                                                                                         |
|------------|------------|-----------|----------|---------------------|------------------------------------|-----------------------------------------------------------------------------------------|
|            |            |           |          | 1,336,602           | <i>marcescens</i> Sh1A)            | with hemagglutinin/hemolysin-related protein. Putative transmembrane secreted protein   |
|            | TpsB2      | NP_928462 | 554 aa   | 1,336,651-1,338,315 | 24.5% ( <i>S. marcescens</i> Sh1B) | Similar to hemolysin secretion/activation protein                                       |
|            | TpsA3      | NP_927675 | 1,480 aa | 334,184-338,626     | 42.5% ( <i>S. marcescens</i> Sh1A) | Hemolysin PhlA                                                                          |
|            | TpsB3      | NP_927676 | 555 aa   | 338,692-340,359     | 60.8% ( <i>S. marcescens</i> Sh1A) | PhlA hemolysin secretion/activation protein PhlB                                        |
|            | TpsA4      | NP_927898 | 4,582 aa | 604,770-618,518     | 20.1% ( <i>B. pertussis</i> FhaA)  | Probable hemolysin/adhesion, similar to hemagglutinin/hemolysin-related protein         |
|            | TpsB4      | NP_927899 | 563 aa   | 618,577-620,268     | 22.8% ( <i>B. pertussis</i> FhaB)  | Probable hemolysin secretion/activation Protein                                         |
|            | TpsA5      | NP_928667 | 2,961 aa | 1,629,806-1,638,691 | 20.9% ( <i>B. pertussis</i> FhaA)  | Probable hemagglutinin secreted protein, similar to hemagglutinin-like secreted protein |
|            | TpsB5      | NP_928668 | 554 aa   | 1,638,740-1,640,404 | 22.8% ( <i>B. pertussis</i> FhaB)  | Similar to hemolysin secretion/activation Protein                                       |
|            | TpsA6      | NP_930925 | 3,027 aa | 4,374,057-4,383,140 | 21.4% ( <i>B. pertussis</i> FhaA)  | Similar to hemagglutinin/hemolysin-related proteins, putative transmembrane protein     |
|            | TpsB6      | NP_930926 | 554 aa   | 4,383,189-4,384,853 | 22.5% ( <i>B. pertussis</i> FhaB)  | Similar to outer membrane hemolysin activator Protein                                   |
| Chaperone/ | Chaperone1 | NP_927768 | 252 aa   | 442,724-443,482     | 48.8% ( <i>E. coli</i> PapD)       | Putative fimbrial chaperone                                                             |
|            | Usher1     | NP_927769 | 862 aa   | 443,812-446,400     | 45.5% ( <i>E. coli</i> PapC)       | Similar to outer membrane usher protein precursor                                       |
|            | Chaperone2 | NP_928117 | 249 aa   | 892,422-893,171     | 50.6% ( <i>E. coli</i> PapD)       | MrfD protein                                                                            |
|            | Usher2     | NP_928116 | 851 aa   | 889,743-892,298     | 45.2% ( <i>E. coli</i> PapC)       | Outer membrane usher protein MrfC                                                       |
|            | Chaperone3 | NP_928125 | 239 aa   | 898,142-898,861     | 28.5% ( <i>E. coli</i> PapD)       | Putative fimbrial chaperone                                                             |

|       |            |           |        |                     |                              |                                                                                                                   |
|-------|------------|-----------|--------|---------------------|------------------------------|-------------------------------------------------------------------------------------------------------------------|
| Usher | Usher3     | NP_928129 | 880 aa | 901,098-903,740     | 28.3% ( <i>E. coli</i> PapC) | Similar to outer membrane usher protein precursor                                                                 |
|       | Chaperone4 | NP_928134 | 249 aa | 907,349-908,098     | 27.1% ( <i>E. coli</i> PapD) | Similar to putative fimbrial chaperone                                                                            |
|       | Usher4     | NP_928136 | 880 aa | 909,069-911,711     | 28.5% ( <i>E. coli</i> PapC) | Similar to outer membrane usher protein precursor                                                                 |
|       | Chaperone5 | NP_928330 | 222 aa | 1,180,887-1,181,555 | 26.8% ( <i>E. coli</i> PapD) | Similar to putative fimbrial chaperone                                                                            |
|       | Usher5     | NP_928329 | 837 aa | 1,178,368-1,180,881 | 28.5% ( <i>E. coli</i> PapC) | Similar to outer membrane usher protein precursor                                                                 |
|       | Chaperone6 | NP_927859 | 232 aa | 556,388-557,086     | 27.5% ( <i>E. coli</i> PapD) | Similar to putative chaperone                                                                                     |
|       | Usher6     | NP_927858 | 824 aa | 553,888-556,362     | 26.6% ( <i>E. coli</i> PapC) | Similar to outer membrane usher protein precursor                                                                 |
|       | Chaperone7 | NP_929418 | 224 aa | 2,542,960-2,543,634 | 29.8% ( <i>E. coli</i> PapD) | Putative fimbrial chaperone, similar to hypothetical fimbrial chaperone YraI precursor of <i>Escherichia coli</i> |
|       | Usher7     | NP_929417 | 846 aa | 2,540,382-2,542,922 | 26.5% ( <i>E. coli</i> PapC) | Similar to hypothetical outer membrane usher protein YraJ precursor of <i>Escherichia coli</i>                    |
|       | Chaperone8 | NP_927629 | 239 aa | 281,565-282,284     | 26.1% ( <i>E. coli</i> PapD) | Similar to putative fimbrial chaperone                                                                            |
|       | Usher8     | NP_927631 | 876 aa | 283,299-285,929     | 29% ( <i>E. coli</i> PapC)   | Similar to outer membrane usher protein precursor                                                                 |
